# Supplementary material
Source: publisher site journal article supplement (https://www.dovepress.com/article/312129)
Supplement: Supplementary file 1 [file get_supplementary_file.php]

**Supplementary Table 1. Characteristics of 669 patients experienced atherosclerosis according to CKD stage**

|  | Total (n = 669) | Stage 1-3 (n =190) | Stage 4-5 (n = 479) | t/z/χ2 | P-value |
| --- | --- | --- | --- | --- | --- |
| Age, n(%) | 62.011.9 | 61.412.2 | 62.211.8 | -0.858 | 0.391 |
| 40 years | 24(3.6%) | 8(4.2%) | 16(3.3%) | 0.912 | 0.634 |
| 41~65 years | 367(54.9%) | 108(56.8%) | 259(54.1%) |
| >65 years | 278(41.6%) | 74(38.9%) | 204(42.6%) |
| Male, n(%) | 462(69.1%) | 144(75.8%) | 318(66.4%) | 5.627 | 0.018 |
| Cardiovascular disease, n (%) | 294(43.9%) | 53(27.9%) | 241(50.3%) | 27.755 | <0.001 |
| Diabetes, n (%) | 259(38.7%) | 72(37.9%) | 187(39.0%) | 0.075 | 0.784 |
| Hypertension, n (%) | 549(82.1%) | 131(68.9%) | 418(87.3%) | 31.010 | <0.001 |
| Smoking, n (%) | 246(36.8%) | 70(36.8%) | 176(36.7%) | 0.001 | 0.981 |
| Drinking, n (%) | 193(28.8%) | 64(33.7%) | 129(26.9%) | 3.022 | 0.082 |
| Body mass index, kg/m2 | 23.93.6 | 24.93.7 | 23.53.6 | 4.178 | <0.001 |
| Systolic blood pressure, mmHg | 143.525.3 | 134.321.6 | 147.225.8 | -6.579 | <0.001 |
| Uric acid, μmol/L | 424.4129.8 | 388.4108.4 | 438.6134.9 | -5.023 | <0.001 |
| Serum hemoglobin, g/L | 100.526.1 | 120.722.8 | 92.622.9 | 14.119 | <0.001 |
| Albumin, g/L | 36.5(31.5-40.8) | 38.3(30.4-43.0) | 36.1(31.8-39.9) | -4.003 | <0.001 |
| Phosphorus, mmol/L | 1.410.50 | 1.110.22 | 1.520.53 | -14.084 | <0.001 |
| Calcium, mmol/L | 2.150.23 | 2.230.18 | 2.120.24 | 6.355 | <0.001 |
| Intact parathyroid hormone, pg/mL | 183.2(74.9-356.8) | 62.1(44.9-91.3) | 242.1(128.3-436.2) | -12.974 | <0.001 |
| Platelet counts,109/L | 172.0(126.0-225.3) | 189.5(137.0-231.3) | 165.0(125.0-213.0) | -3.357 | 0.001 |
| Blood glucose, mmol/L | 4.86(4.24-5.98) | 5.10(4.44-6.42) | 4.74(4.16-5.83) | -3.528 | <0.001 |
| Urine total protein, g/24h | 2.04(0.67-4.53) | 1.13(0.20-3.34) | 2.36(1.10-4.84) | -5.555 | <0.001 |
| C-reactive protein, mg/L | 5.00(2.50-15.50) | 4.20(2.50-9.15) | 6.00(2.53-17.90) | -3.357 | 0.001 |
| Total cholesterol, mmol/L | 4.27(3.61-5.26) | 4.90(4.05-5.97) | 4.08(3.44-4.99) | -6.192 | <0.001 |
| Triglyceride, mmol/L | 1.50(1.10-2.09) | 1.69(1.23-2.35) | 1.46(1.07-1.91) | -3.551 | <0.001 |
| High density lipoprotein, mmol/L | 1.04(0.85-1.28) | 1.10(0.92-1.33) | 1.02(0.82-1.24) | -3.157 | 0.002 |
| Low density lipoprotein, mmol/L | 2.36(1.78-3.04) | 2.88(2.21-3.66) | 2.21(1.69-2.76) | -6.602 | <0.001 |
| Uric acid: mg/dL=μmol/L×0.01681, Serum hemoglobin, g/dL=g/L×0.1，Albumin: g/dL=g/L×0.1, Phosphorus: mg/dL=mmol/L×3.097, Calcium: mg/dL=mmol/L×4.008, Intact parathyroid hormone: mg/dL=pg/mL, Platelet counts: mm3=109/L×1000, Blood glucose: mg/dL =mmol/L×18.02, C-reactive protein: mg/dL=mg/L×0.1, Total cholesterol: mg/dL=mmol/L×38.67, Triglyceride: mg/dL=mmol/L×88.545, High density lipoprotein: mg/dL=mmol/L×38.61, Low density lipoprotein: mmol/L mg/dL=mmol/L×38.61. | | | | | |

| **Supplementary Table 2. Subgroup analysis based on gender and age** | | | | | | |
| --- | --- | --- | --- | --- | --- | --- |
| Characteristics | Gender | | P-value | Age | | P-value |
| Male  (n=462) | Female  (n=207) | 65 years  (n=391) | >65 years  (n=278) |
| Cardiovascular disease, n (%) | 206(44.6%) | 88(42.5%) | 0.617 | 142(36.3%) | 152(54.7%) | <0.001 |
| Diabetes, n (%) | 199(43.1%) | 60(29.0%) | 0.001 | 158(40.4%) | 101(36.3%) | 0.286 |
| Hypertension, n (%) | 373(80.7%) | 176(85.0%) | 0.181 | 319(81.6%) | 230(82.7%) | 0.703 |
| Smoke, n (%) | 244(52.8%) | 2(1.0%) | <0.001 | 162(41.4%) | 84(30.2%) | 0.003 |
| Alcohol, n (%) | 187(40.5%) | 6(2.9%) | <0.001 | 122(31.2%) | 71(25.5%) | 0.111 |
| Body mass index, kg/m2 | 24.13.4 | 23.34.0 | 0.030 | 24.13.7 | 23.43.6 | 0.021 |
| Systolic blood pressure, mmHg | 142.124.5 | 146.626.8 | 0.034 | 143.425.8 | 143.724.8 | 0.896 |
| Uric acid, μmol/L | 420.9126.7 | 432.1136.6 | 0.302 | 424.4131.3 | 424.2128.0 | 0.985 |
| Serum hemoglobin, g/L | 102.627.2 | 95.922.8 | 0.001 | 100.927.5 | 100.024.0 | 0.684 |
| Albumin, g/L | 36.4(31.0-40.6) | 37.5(32.9-41.2) | 0.142 | 36.5(31.8-41.1) | 36.4(31.5-40.2) | 0.721 |
| Phosphorus, mmol/L | 1.390.51 | 1.450.48 | 0.133 | 1.440.54 | 1.360.45 | 0.034 |
| Calcium, mmol/L | 2.140.21 | 2.180.25 | 0.058 | 2.160.23 | 2.140.22 | 0.244 |
| Intact parathyroid hormone, pg/mL | 157.1(72.7-320.0) | 215.2(86.7-437.9) | 0.015 | 186.4(73.4-371.0) | 179.3(78.2-323.6) | 0.598 |
| Platelet counts,109/L | 173.0(129.0-225.5) | 171.0(124.0-225.5) | 0.500 | 179.0(131.0-229.0) | 161.0(121.0-216.0) | 0.008 |
| Blood glucose, mmol/L | 4.81(4.21-6.17) | 4.97(4.34-5.74) | 0.653 | 4.78(4.18-6.13) | 4.98(4.30-5.97) | 0.515 |
| Urine total protein, g/24h | 2.26(0.74-4.85) | 1.58(0.59-3.61) | 0.011 | 2.39(0.84-4.95) | 1.56(0.56-3.90) | 0.002 |
| C-reactive protein, mg/L | 5.20(2.90-17.45) | 4.70(2.30-15.00) | 0.045 | 5.00(2.30-15.93) | 5.10(2.90-14.85) | 0.192 |
| Total cholesterol, mmol/L | 4.21(3.57-5.18) | 4.46(3.78-5.45) | 0.087 | 4.41(3.72-5.42) | 4.08(3.37-5.05) | 0.005 |
| Triglyceride, mmol/L | 1.43(1.07-2.07) | 1.66(1.22-2.14) | 0.017 | 1.59(1.17-2.33) | 1.40(1.00-1.89) | <0.001 |
| High density lipoprotein, mmol/L | 1.01(0.82-1.24) | 1.09(0.92-1.34) | 0.001 | 1.02(0.84-1.24) | 1.07(0.87-1.32) | 0.081 |
| Low density lipoprotein, mmol/L | 2.37(1.84-3.02) | 2.34(1.71-3.09) | 0.596 | 2.45(1.84-3.08) | 2.22(1.69-2.99) | 0.034 |
| Uric acid: mg/dL=μmol/L×0.01681, Serum hemoglobin, g/dL=g/L×0.1，Albumin: g/dL=g/L×0.1, Phosphorus: mg/dL=mmol/L×3.097, Calcium: mg/dL=mmol/L×4.008, Intact parathyroid hormone: mg/dL=pg/mL, Platelet counts: mm3=109/L×1000, Blood glucose: mg/dL =mmol/L×18.02, C-reactive protein: mg/dL=mg/L×0.1, Total cholesterol: mg/dL=mmol/L×38.67, Triglyceride: mg/dL=mmol/L×88.545, High density lipoprotein: mg/dL=mmol/L×38.61, Low density lipoprotein: mmol/L mg/dL=mmol/L×38.61. | | | | | | |

| **Supplementary Table 3. Previous studies of atherosclerosis in general and CKD population** | | | | | | |
| --- | --- | --- | --- | --- | --- | --- |
| **Author** | **Year** | **Population** | **Number** | **Age** | **Outcomes** | **Associated factors** |
| Manjunath *et al.1* | 2003 | Subjects with GFR between 15 to 150 ml/min/1.73 m2 (stage 1-4) | 15,792 | 45-64 | Atherosclerotic cardiovascular disease | CKD |
| de Weerd *et al. 2* | 2010 | General population | 23 706 | 60.5 | Asymptomatic moderate and severe carotid stenosis | age and sex |
| Recio-Mayoral *et al. 3* | 2011 | Predialysis, hemodialysis and kidney-transplant patients and a group of 65 age and gender matched controls | 76 | 56 ± 12 | Carotid artery intima-media thickness | CRP levels |
| Gijsberts *et al. 4* | 2015 | General population | 60,211 | 59 | Carotid intima-media thickness | Ethnicity |
| van den Munckhof *et al. 5* | 2018 | Healthy population | 10,124 | 48±17 | Increased carotid artery intima-medial thickness | Age |
| Song *et al.6* | 2020 | General population | 747, 2074 | 30–79 | Carotid intima-media thickness, carotid plaque, and carotid stenosis | Age, sex, smoking,  diabetes, hypertension |

**References**

1. Manjunath G, Tighiouart H, Ibrahim H, *et al*. Level of kidney function as a risk factor for atherosclerotic cardiovascular outcomes in the community. *J Am Coll Cardiol.* 2003;41(1):47-55.

2. de Weerd M, Greving JP, Hedblad B, *et al*. Prediction of asymptomatic carotid artery stenosis in the general population: identification of high-risk groups. *Stroke.* 2014;45(8):2366-71.

3. Recio-Mayoral A, Banerjee D, Streather C, Kaski JC. Endothelial dysfunction, inflammation and atherosclerosis in chronic kidney disease--a cross-sectional study of predialysis, dialysis and kidney-transplantation patients. *Atherosclerosis.* 2011;216(2):446-51.

4. Gijsberts CM, Groenewegen KA, Hoefer IE, et al. Race/Ethnic Differences in the Associations of the Framingham Risk Factors with Carotid IMT and Cardiovascular Events. *PLoS ONE.* 2015;10(7):e0132321.

5. van den Munckhof ICL, Jones H, Hopman MTE, *et al*. Relation between age and carotid artery intima-medial thickness: a systematic review. *Clin Cardiol.* 2018;41(5):698-704.

6. Song P, Fang Z, Wang H, et al. Global and regional prevalence, burden, and risk factors for carotid atherosclerosis: a systematic review, meta-analysis, and modelling study. *Lancet Glob Health.* 2020;8(5):e721-e729.
